# Supplementary material for: Construction of Tissue-Engineered Bladder Scaffolds with Composite Biomaterials
Source: MDPI journal article supplement (doi:10.3390/polym14132654), 2022-06-29
Supplement: s1 [file s1]

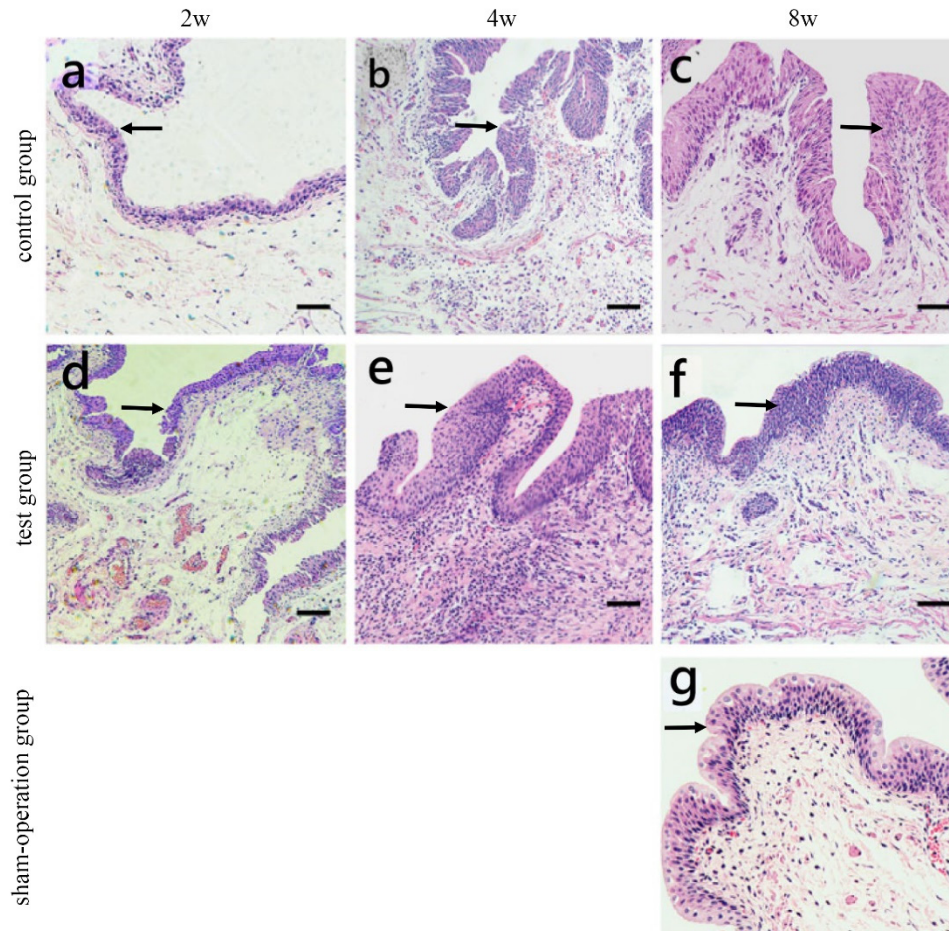

**Figure S1.** The cell growth by haematoxylin and eosin (H&E) staining. H&E staining showed that with the passage of time (2w ~ 8w), the number of urothelial cells migrating to the marginal zone and those migrating to the central zone gradually increased.
